# Supplementary material
Source: publisher site journal article supplement (https://www.dovepress.com/article/311021)
Supplement: Supplementary file 1 [file get_supplementary_file.php]

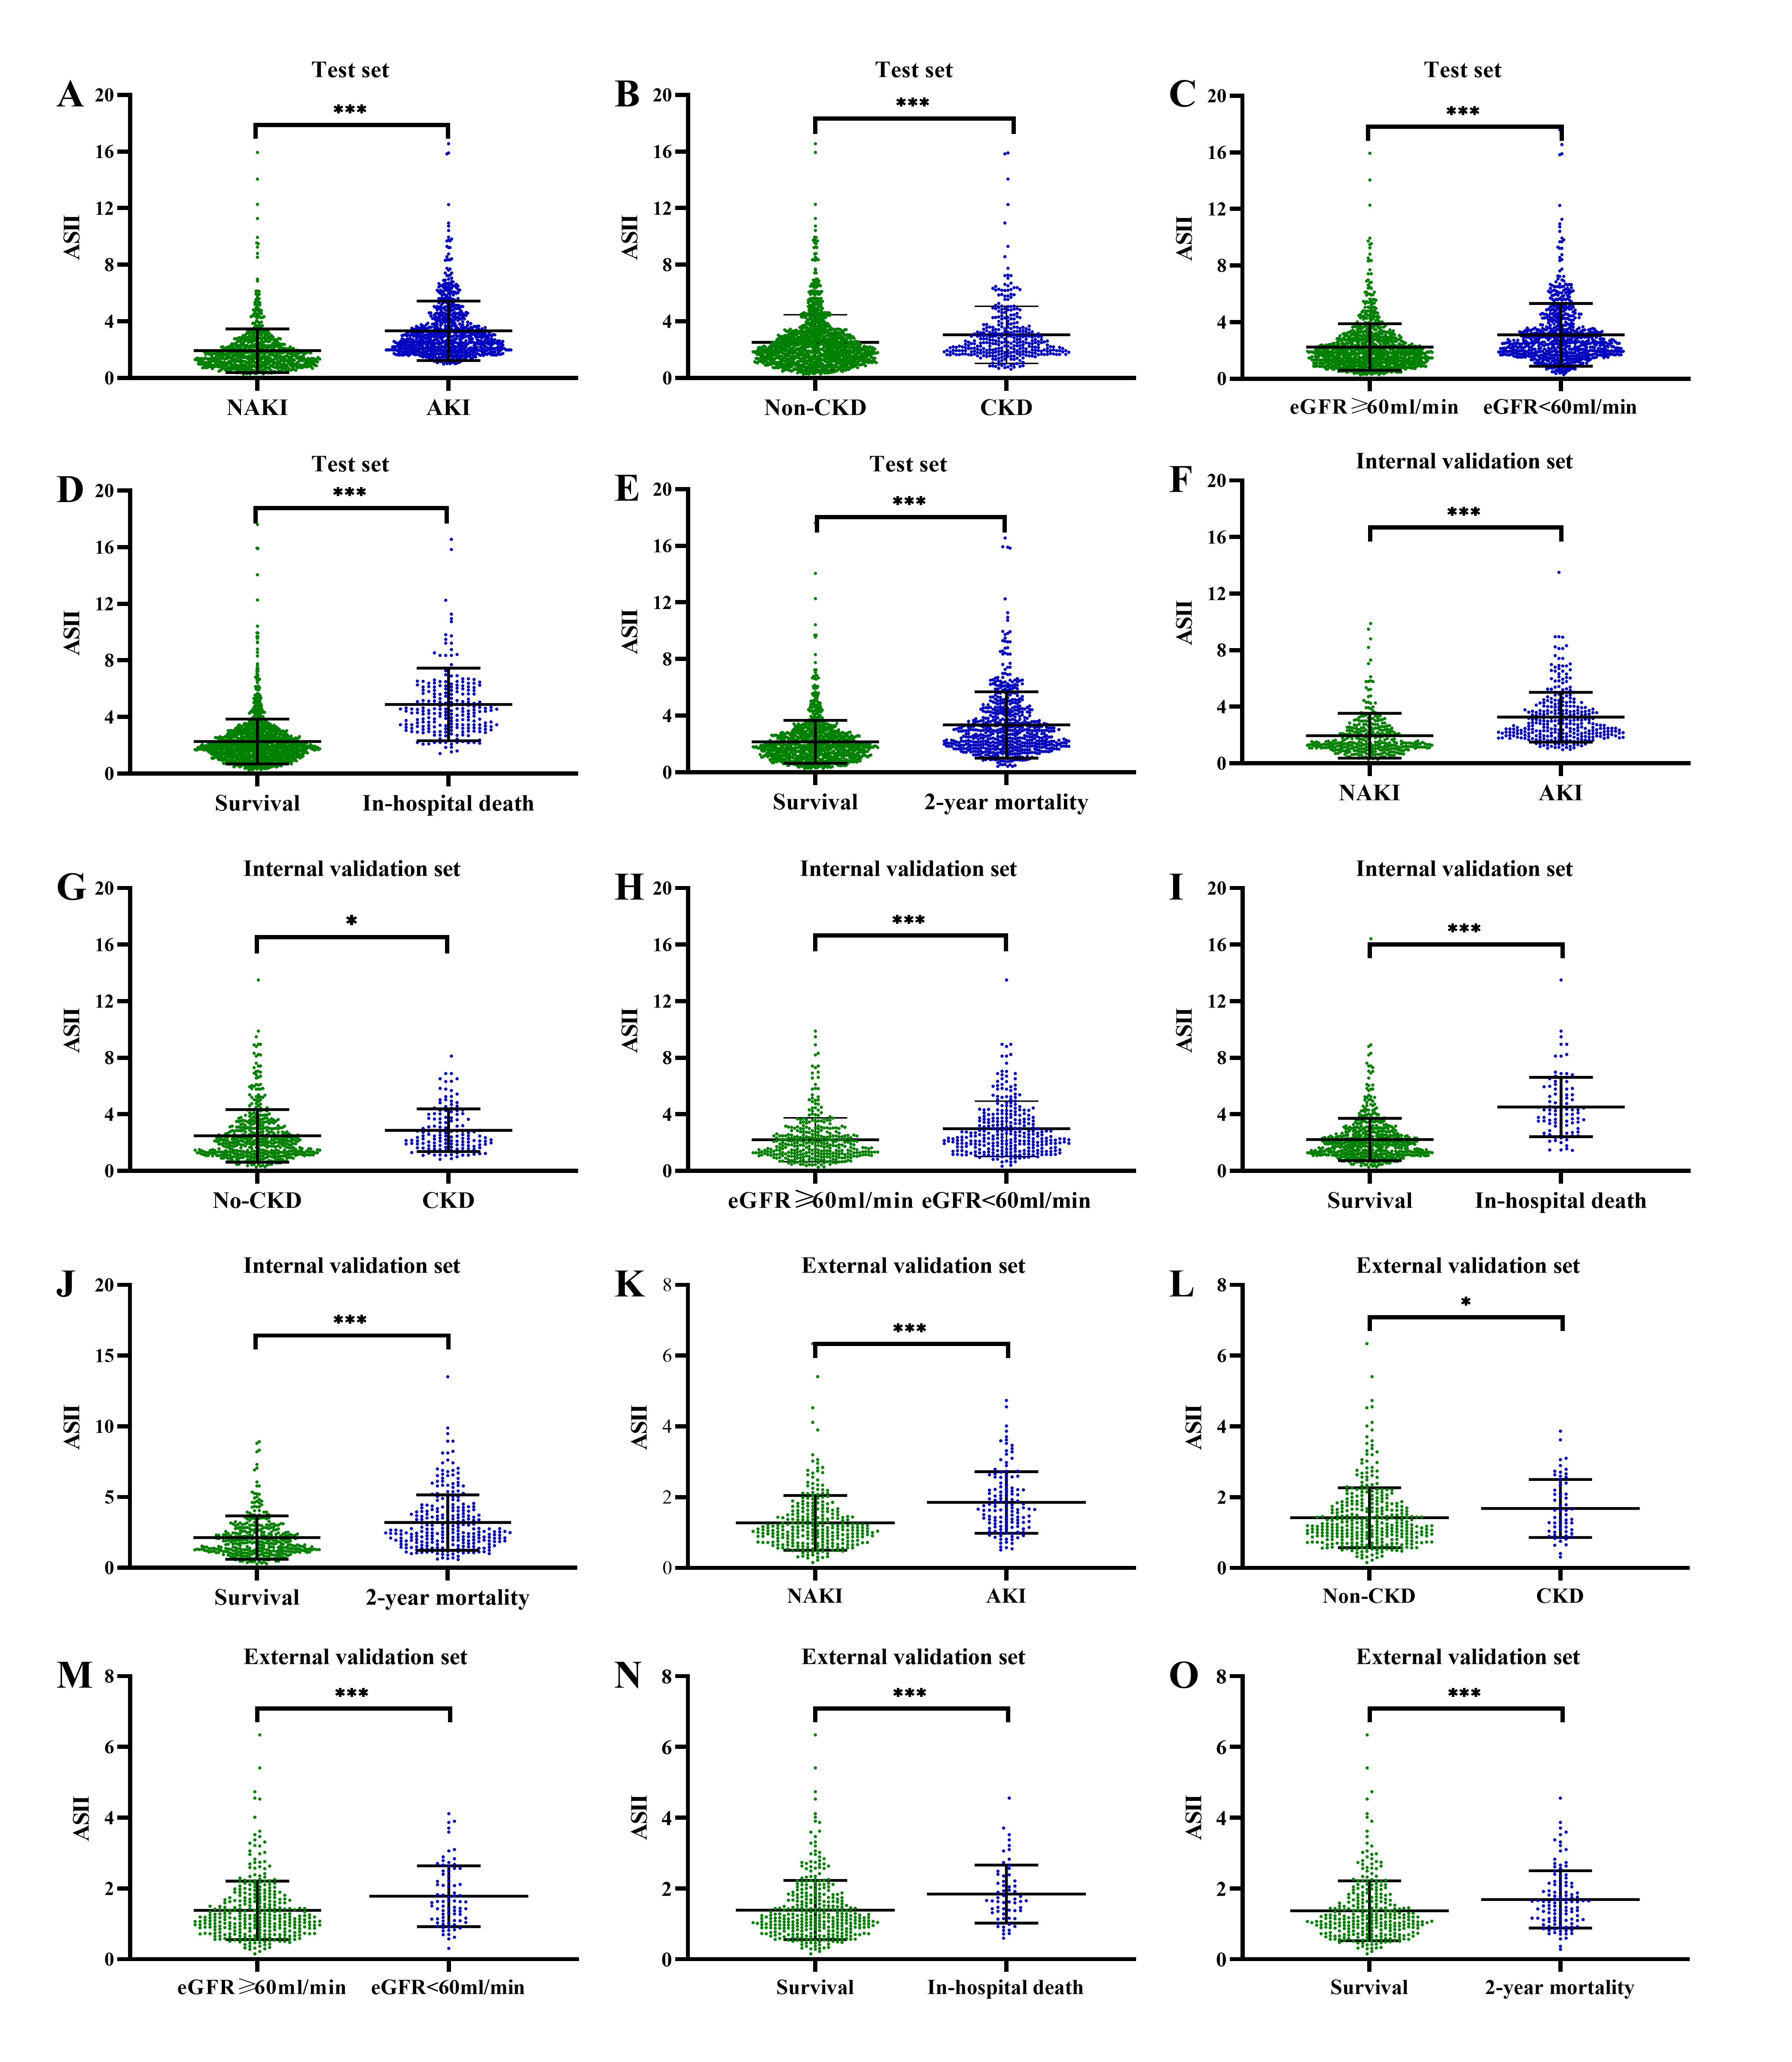


**Figure S1**. Association between ASII and clinical features.

ASII was significantly associated with AKI (**A**), CKD (**B**), eGFR (**C**), in-hospital mortality (**D**) and 2-year mortality (**E**) in training set. ASII was significantly associated with AKI stage (**F**), CKD (**G**), eGFR (**H**), in-hospital mortality (**I**) and 2-year mortality (**J**) in internal validation set. ASII was significantly associated with AKI stage (**K**), CKD (**L**), eGFR (**M**), in-hospital mortality (**N**) and 2-year mortality (**O**) in external validation set.
